# Supplementary material for: Physical Activity, Mental Health and Wellbeing of Adults within and during the Easing of COVID-19 Restrictions, in the United Kingdom and New Zealand
Source: MDPI journal article supplement (doi:10.3390/ijerph19031792), 2022-02-04
Supplement: s1 [file s1]

**Supplementary Table S1:** Changes in exercise behaviours (positive, negative, no change) from T1 to T2 by sex, age groups, ethnicity, long-term health condition and country.

|                  | Negative change<br>(n=552) | Relative risk<br>compared to no<br>change | No change (n=2330) | Positive change<br>(n=480) | Relative risk<br>compared to no<br>change |
|------------------|----------------------------|-------------------------------------------|--------------------|----------------------------|-------------------------------------------|
| <b>Sex</b>       |                            |                                           |                    |                            |                                           |
| Male             | 120 (12.9%)                | REF                                       | 686 (73.5%)        | 127 (13.6%)                | REF                                       |
| Female           | 428 (17.7%)                | 1.36 (1.09, 1.71)*                        | 1637 (67.8%)       | 349 (14.5%)                | 1.18 (0.93, 1.48)                         |
| <b>Age group</b> |                            |                                           |                    |                            |                                           |
| 18-29 years      | 90 (22.6%)                 | REF                                       | 240 (60.2%)        | 69 (17.3%)                 | REF                                       |
| 30-39 years      | 113 (19.3%)                | 0.84 (0.61, 1.17)                         | 368 (62.7%)        | 106 (18.1%)                | 0.96 (0.68, 1.37)                         |
| 40-49 years      | 115 (16.3%)                | 0.65 (0.47, 0.90)*                        | 490 (69.3%)        | 102 (14.4%)                | 0.77 (0.54, 1.09)                         |
| 50-59 years      | 136 (18.1%)                | 0.70 (0.51, 0.96)*                        | 533 (70.8%)        | 84 (11.2%)                 | 0.54 (0.38, 0.79)*                        |
| 60-69 years      | 68 (11.0%)                 | 0.41 (0.29, 0.60)*                        | 469 (75.5%)        | 84 (13.5%)                 | 0.64 (0.44, 0.93)*                        |
| 70-79 years      | 29 (10.8%)                 | 0.39 (0.25, 0.63)*                        | 209 (78.0%)        | 30 (11.2%)                 | 0.53 (0.33, 0.85)*                        |
| 80+ years        | 1 (4.2%)                   | 0.16 (0.02, 1.20)                         | 19 (79.2%)         | 4 (16.7%)                  | 0.89 (0.28, 2.76)                         |
| <b>Ethnicity</b> |                            |                                           |                    |                            |                                           |
| White            | 514 (16.2%)                | REF                                       | 2218 (69.8%)       | 448 (14.1%)                | REF                                       |
| Polynesian       | 15 (24.2%)                 | 1.52 (0.82, 2.82)                         | 42 (67.7%)         | 5 (8.1%)                   | 0.84 (0.33, 2.16)                         |
| Indian           | 2 (25.0%)                  | 0.88 (0.33, 2.37)                         | 22 (59.5%)         | 10 (27.0%)                 | 2.17 (1.01, 4.67)*                        |
| Asian            | 4 (13.8%)                  | 0.80 (0.27, 2.39)                         | 20 (69.0%)         | 5 (17.2%)                  | 1.63 (0.60, 4.43)                         |
| Black            | 2 (25.0%)                  | 1.71 (0.31, 9.49)                         | 4 (50.0%)          | 2 (25.0%)                  | 1.69 (0.31, 9.32)                         |

|       |           |                   |            |           |                    |
|-------|-----------|-------------------|------------|-----------|--------------------|
| Mixed | 6 (28.6%) | 1.68 (0.61, 4.60) | 12 (57.1%) | 3 (14.3%) | 0.96 (0.26, 3.48)  |
| Other | 6 (24.0%) | 1.97 (0.72, 5.38) | 12 (48.0%) | 7 (28.0%) | 3.26 (1.25, 8.47)* |

#### Long-term health condition

|     |             |                    |              |             |                   |
|-----|-------------|--------------------|--------------|-------------|-------------------|
| Yes | 164 (20.2%) | REF                | 523 (64.3%)  | 127 (15.6%) | REF               |
| No  | 379 (15.4%) | 0.68 (0.55, 0.84)* | 1748 (70.9%) | 338 (13.7%) | 0.80 (0.63, 1.01) |

#### Country

|                |             |                   |               |             |                    |
|----------------|-------------|-------------------|---------------|-------------|--------------------|
| United Kingdom | 215 (16.1%) | REF               | 865 (65.0%)   | 251 (18.9%) | REF                |
| New Zealand    | 337 (16.6%) | 0.91 (0.75, 1.11) | 1,464 (72.1%) | 229 (11.3%) | 0.51 (0.42, 0.63)* |

\*Significantly difference between items ( $p < 0.001$ ).

**Note:** REF, Reference value; T1, Timepoint 1; T2, Timepoint 2
